# Supplementary material
Source: PubMed Central journal article supplement (PMC1276950)
Supplement: bj3910491add.pdf [file bj3910491add.pdf]

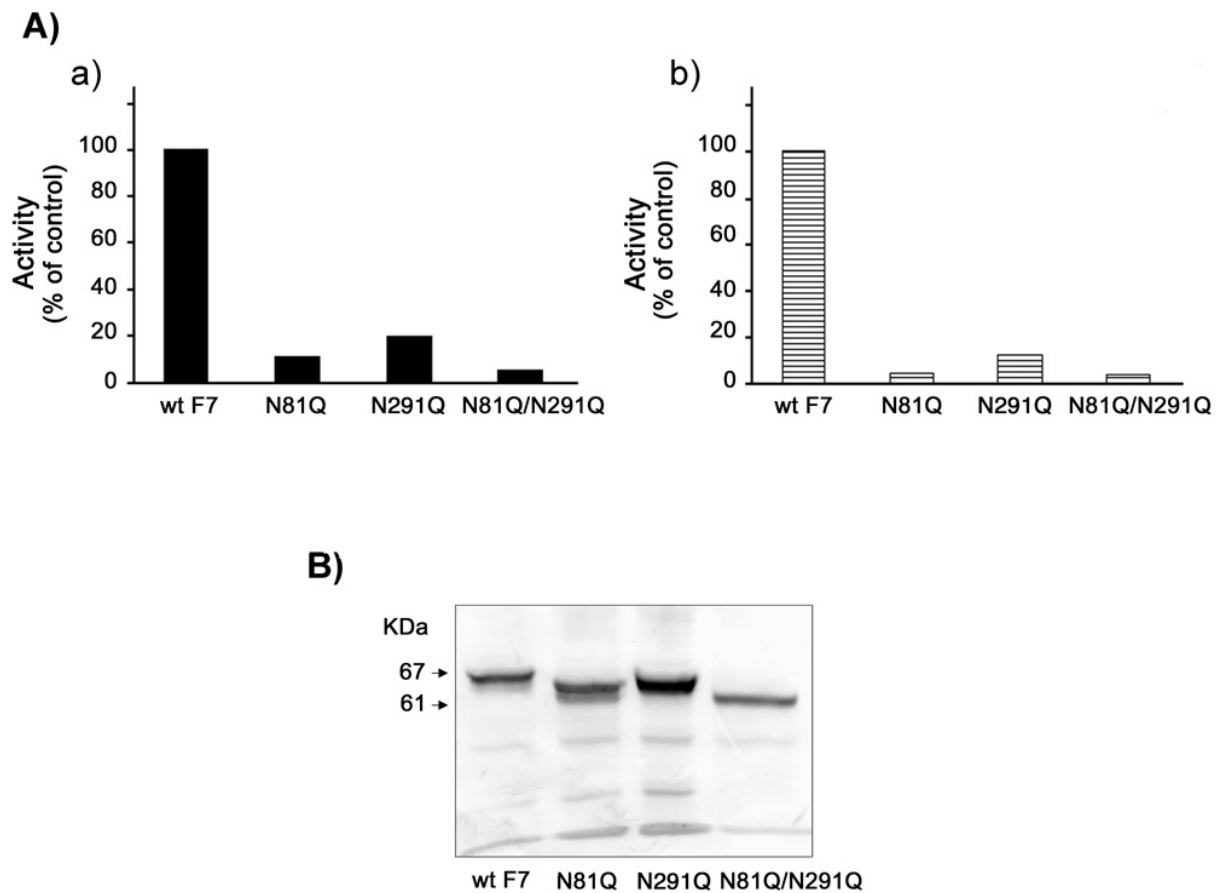

**Supplementary Figure 1: In vitro activities of membrane-associated and the detergent-extracted forms of FucT-VII and glycomutants.** **A:** Crude membranes (sonicated cells, **a**) or detergent extracts (**b**) prepared from cells expressing the wild-type or the mutated FucT-VII, were assayed for  $\alpha(1,3)$ -fucosyltransferase activity as in Table-III, except that the oligosaccharide NeuAc $\alpha$ 2,3Gal $\alpha$ 1,4GlcNAc-octyl was used as an acceptor instead of fetuin. Results are expressed as % of the wild-type activity. **B:** After 2h incubation at 37°C, aliquots from the assay were recovered and analyzed by SDS/PAGE and immunoblotting as in Fig.2. The results are representative of two independent experiments.
